# Supplementary material for: Redox-active and Brønsted basic dual sites for photocatalytic activation of benzylic C–H bonds based on pyridinium derivatives
Source: Royal Society of Chemistry journal article supplement (doi:10.1039/d1gc04370f), 2022-01-01

Electronic Supplementary Material (ESI) for Green Chemistry. This journal is © The Royal Society of Chemistry

# **Redox-active and Brønsted Basic Dual Sites for Photocatalytic activation of benzylic C-H bonds based on Pyridinium Derivative**

*Shuai Ma<sup>a</sup>, Jin-Ming Ma<sup>b</sup>, Jing-Wang Cui<sup>a</sup>, Cai-Hui Rao<sup>a</sup>, Meng-Ze Jia<sup>a</sup>, Jie Zhang<sup>a\*</sup>*

*a S. Ma, J. W. Cui, C. H. Rao, M. Z. Jia, Prof. J. Zhang*

*MOE Key Laboratory of Cluster Science, Beijing Key Laboratory of Photoelectronic/Electrophotonic Conversion Materials*

*School of Chemistry and Chemical Engineering, Beijing Institute of Technology*

*Beijing 102488, P. R. China*

*E-mail: [zhangjie68@bit.edu.cn](mailto:zhangjie68@bit.edu.cn)*

*b J. M. Ma*

*Hebei Key Laboratory of Applied Chemistry*

*School of Environmental and Chemical Engineering, Yanshan University*

*Qinhuangdao 066004, P. R. China*

## Section 1. Experimental section

### 1.1 Materials and methods

All of the chemicals were obtained from commercial sources and were used as received unless otherwise stated. IR spectra (KBr pellets) were obtained on a Nicolet IS10 FT-IR spectrometer. The steady-state UV-vis absorption spectra were measured with a Persee TU-1901 Spectrometer. The transient absorption spectra were measured with a Flucent Helios Ultrafast Systems. The electron spin resonance (ESR) signal was collected with JES-FA200 ESR Spectrometer. <sup>1</sup>H NMR spectrum was carried out on a Bruker AV-400 NMR spectrometer. The GC analyses were performed on Shimadzu GC-2014C with an FID detector equipped with an Rtx-5 capillary column. The 365 nm LED light source for light-induced UV-vis absorption spectra and ESR measurements was obtained by MLED4 system from Zolix Instruments Co.,Ltd. Catalysis reactions under 365nm and visible light irradiation ( $\lambda > 400$  nm) were carried out by using Beijing Perfectlight Multi-channel photochemical reaction system PCX-50C. The steady-state luminescence quenching spectra were recorded on an Edinburgh FS50 spectrofluorometer (PL) at 365 nm laser excitation at room temperature. Phosphorescence spectra were recorded on an Edinburgh FLS1000 at 365 nm laser excitation at room temperature.

Density functional theory (DFT) calculations were carried out by Gaussian-16 software. The M062X density functional method was employed in this work to perform all the computations. The def2-SVP basis set was used for the atoms in geometry optimizations using the PCM solvation model with acetonitrile as solvent. Vibrational frequency analyses at the same level of theory were performed on all optimized structures to characterize stationary points as local minima or transition states. Furthermore, intrinsic reaction coordinate (IRC) calculations were carried out to confirm that transition state structures connect to the appropriate reactants and products. The single-point energy calculations were carried out using the def2-TZVP basis set to provide better energy correction. [ Ref: [1] Gaussian 16, Revision A.03, M. J. Frisch, G. W. Trucks, H. B. Schlegel, et al., Gaussian, Inc., Wallingford CT,

2016; [2] Zhao Y, Truhlar D. G, *Theor Chem. Acc.* 2008, 120, 215–241; [3] Weigend, F.; Ahlrichs, R. *Phys. Chem. Chem. Phys.* **2005**, 7, 3297– 3305]

## 1.2 The NMR and IR details of electron-relay mediators

**TPT:** IR (KBr pellet,  $\text{cm}^{-1}$ ): 3039(w), 1577(m), 1511(s), 1373(s), 1317(w), 1052(w), 991(w), 800 (s), 642(s), 509(m). **TTMBPY·3Br:** IR (KBr pellet,  $\text{cm}^{-1}$ ): 3409(s), 3112(w), 3039(m), 2948(w), 1716(s), 1639(m), 1529(s), 1444(s), 1436(w), 1374(s), 1286(s), 1130(m), 1089(m), 1047(w), 1006(w), 954(w), 817(m), 761(m), 711(w), 669(w), 518(w).  $^1\text{H}$  NMR (400 MHz, DMSO)  $\delta$  9.69 (d,  $J = 6.8$  Hz, 2H), 9.58 (d,  $J = 6.8$  Hz, 2H), 7.79 (d,  $J = 7.7$  Hz, 1H), 7.62-7.70 (m, 3H), 7.53 (t,  $J = 7.6$  Hz, 1H), 7.42 (d,  $J = 8.2$  Hz, 3H), 6.14 (s, 2H), 3.61 (s, 3H). **TTEPY·3Br:** IR (KBr pellet,  $\text{cm}^{-1}$ ): 3405(s), 3116(w), 3039(m), 1640(m), 1585(w), 1527(s), 1456(w), 1370 (s), 1323(w), 1176(w), 823(m), 748(w), 530(w)  $^1\text{H}$  NMR (400 MHz, DMSO)  $\delta$  9.56 (s, 4H), 4.86 (d,  $J = 7.2$  Hz, 2H), 1.68 (t,  $J = 7.3$  Hz, 3H).

## Section 2. Additional data and figures

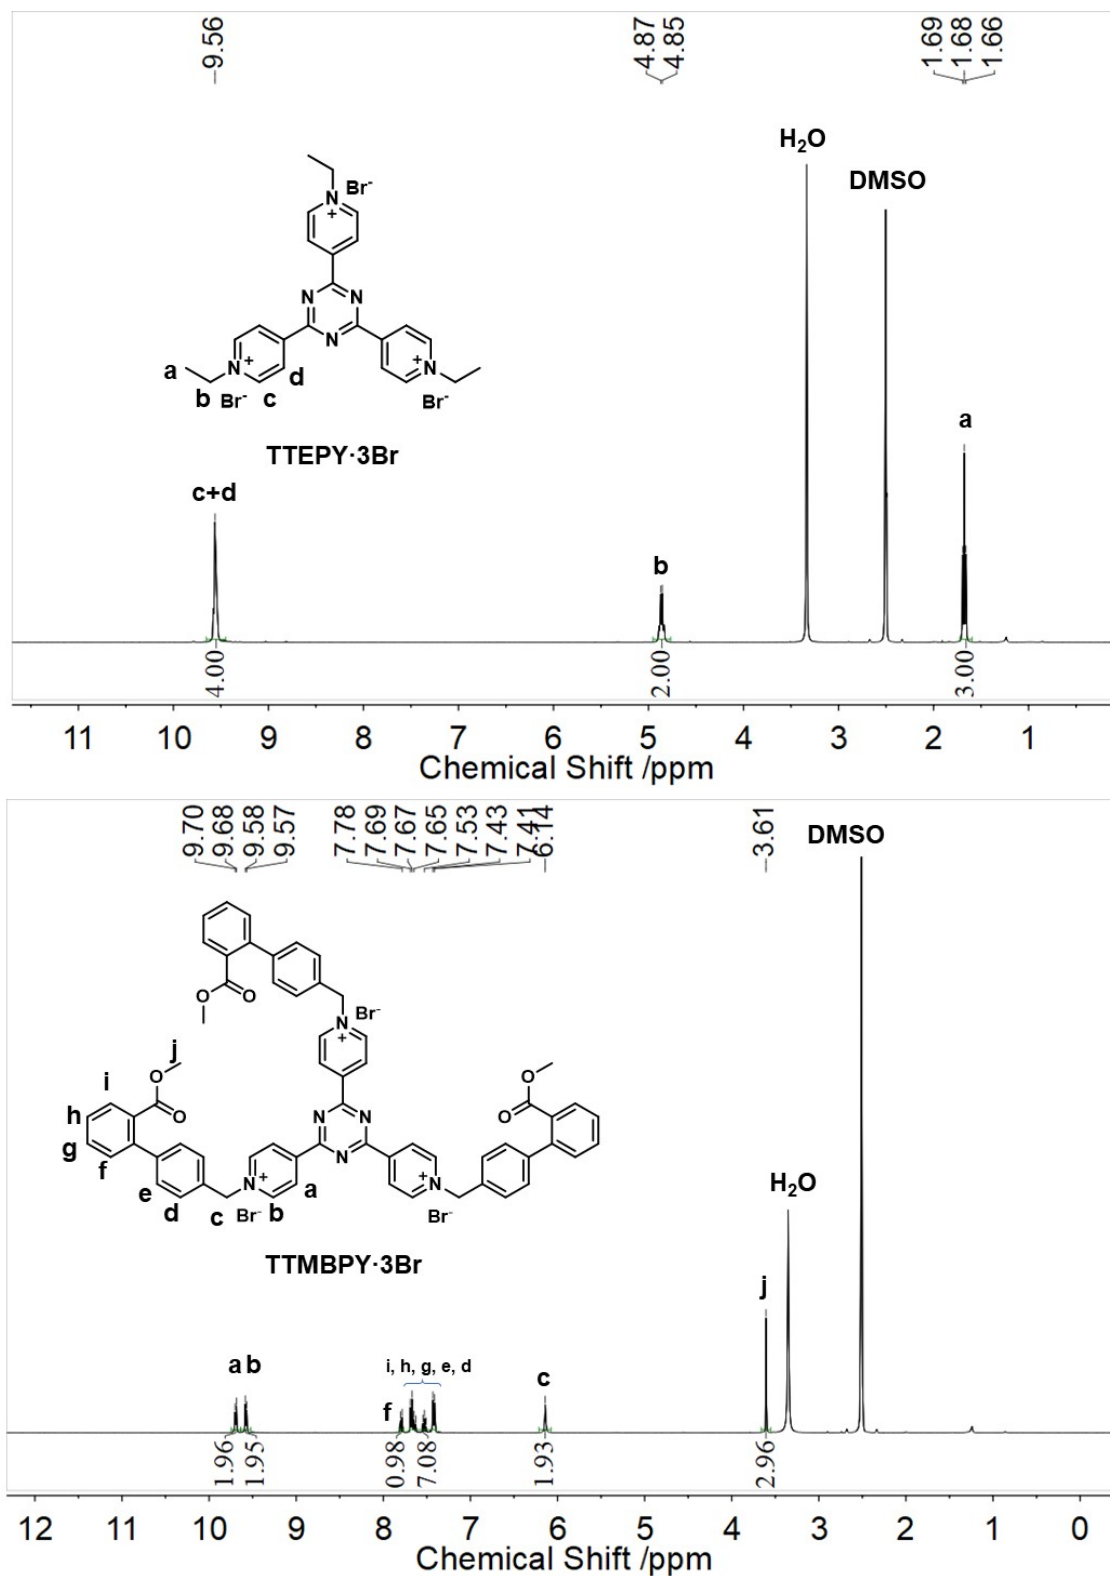

Figure S1. <sup>1</sup>H NMR spectra of TTEPY·3Br and TTMBPY·3Br in DMSO-d<sub>6</sub>

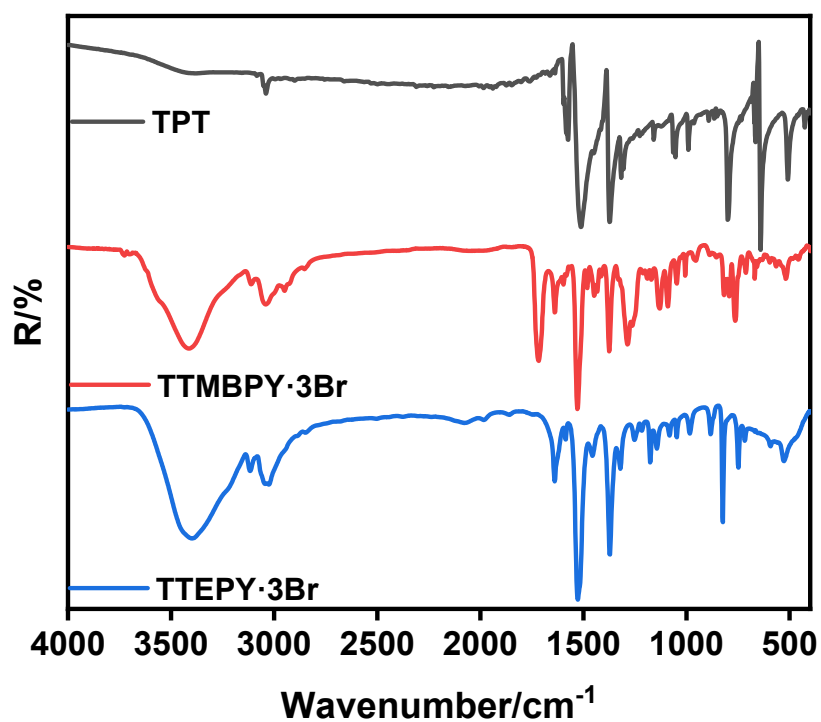

**Figure S2.** FT-IR spectra of TPT, TTMBPY·3Br and TTEPY·Br.

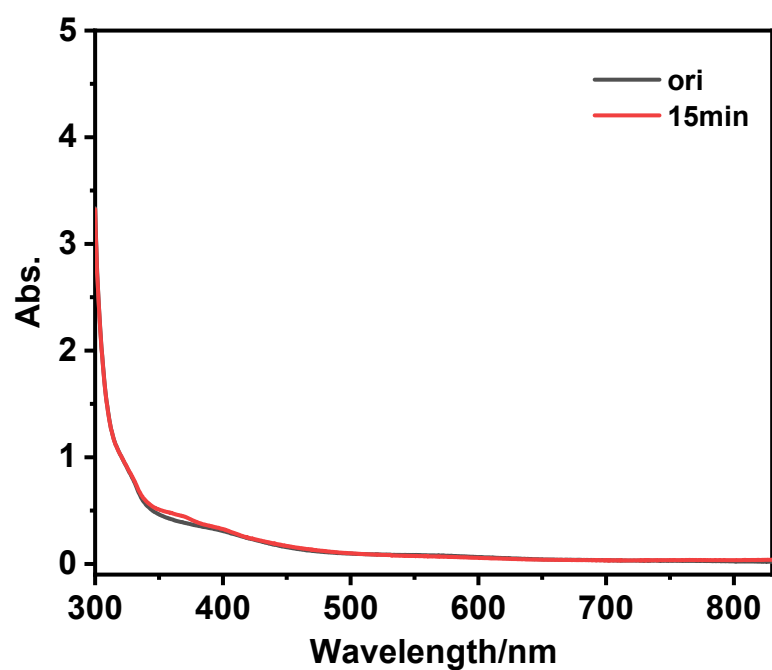

**Figure S3.** UV-vis spectral evolution of TTEPY·3Br ( $5 \times 10^{-4} \text{M}$ ) in  $\text{N}_2$ -saturated MeCN solution upon 365 nm light irradiation.

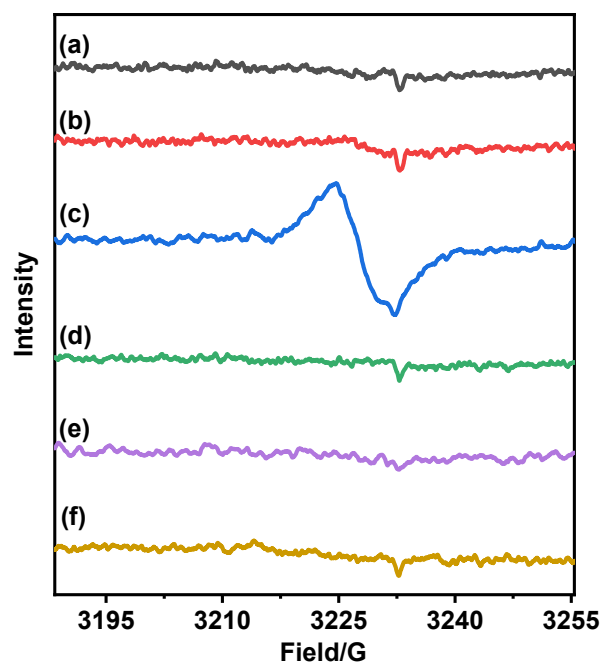

**Figure S4.** The ESR spectral changes of the mixture of TTEPY·3Br and ethylbenzene in MeCN under 365 nm light irradiation: (a) the original state in air; (b) after irradiation under air atmosphere; (c) after irradiation under N<sub>2</sub> atmosphere; (d) exposure to air after irradiation under N<sub>2</sub> atmosphere; (e) MeCN without TTEPY·3Br under 365 nm light irradiation under N<sub>2</sub> atmosphere; (f) Ethylbenzene in MeCN without TTEPY·3Br under 365 nm light irradiation under N<sub>2</sub> atmosphere.

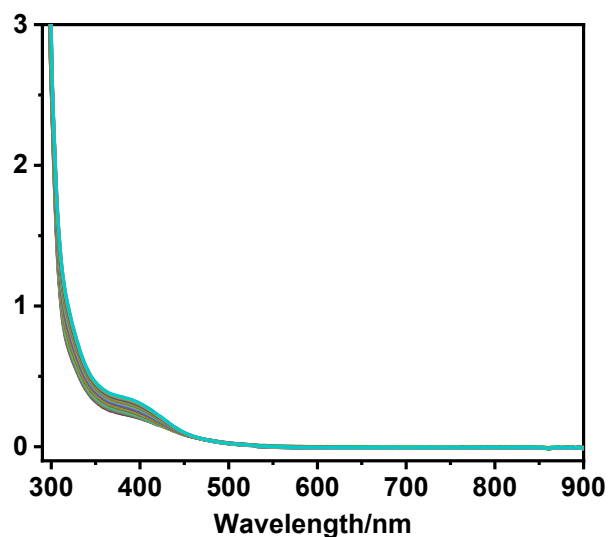

**Figure S5.** UV-vis spectral change of TTEPY·3Br ( $5 \times 10^{-4}$  M) and ethylbenzene (0.5 M) in MeCN under air atmosphere upon 365 nm light irradiation for 15 min.

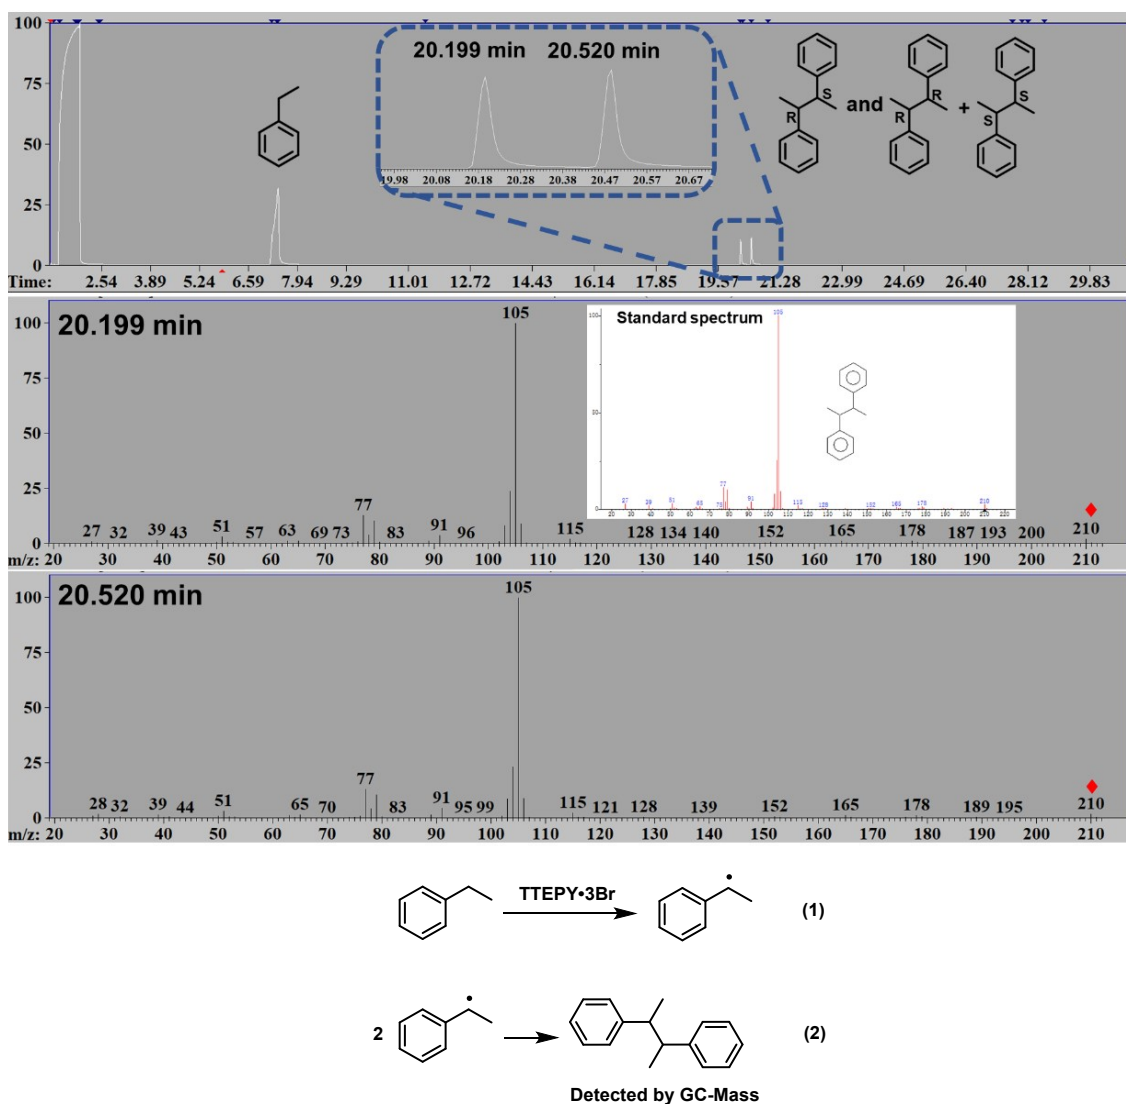

**Figure S6.** GC-Mass trace of crude reaction mixture of the photochemical reaction of ethylbenzene under  $N_2$  atmosphere.

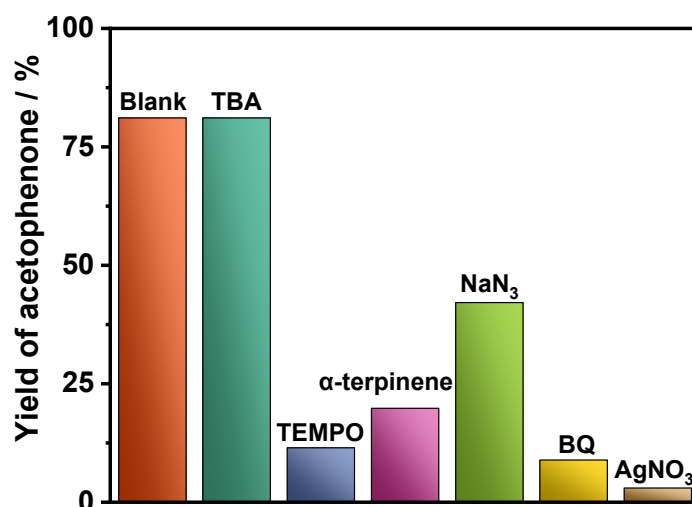

**Figure S7.** Oxidation of ethylbenzene in the presence of different scavengers.

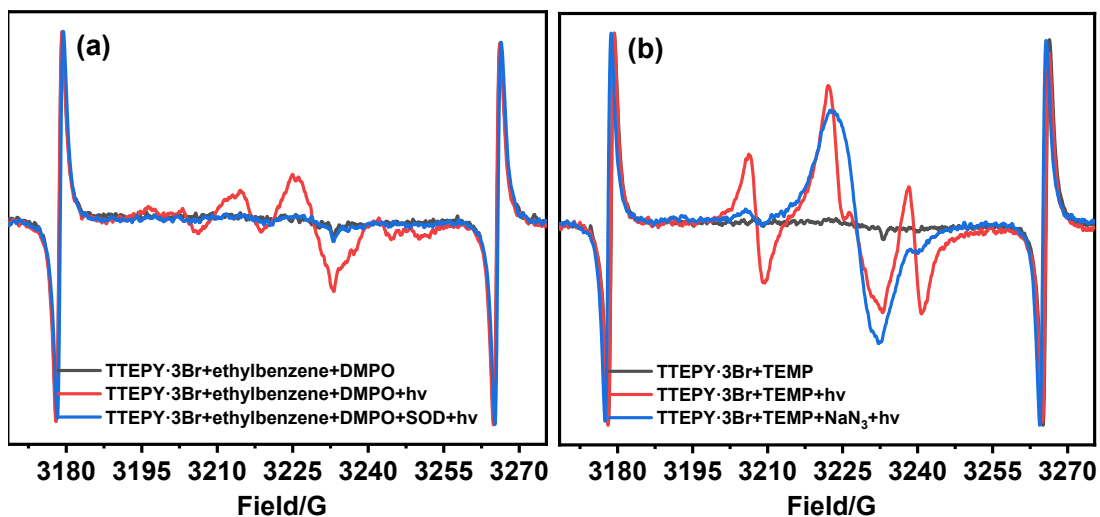

**Figure S8.** (a) ESR spectra of the samples after mixing DMPO with in the presence of ethylbenzene before and after 365 nm irradiation, as well as photoirradiated sample containing additional SOD. (b) ESR spectra of the samples after mixing TEMP with TTEPY·3Br before and after 365 nm irradiation, as well as photoirradiated sample containing additional NaN<sub>3</sub>.

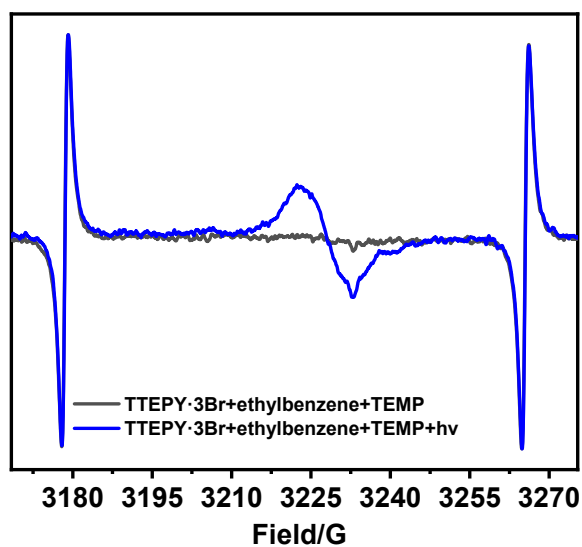

**Figure S9.** ESR spectra of the mixtures of ethylbenzene and TTEPY·3Br in presence of TEMP before and after 365 nm light irradiation.



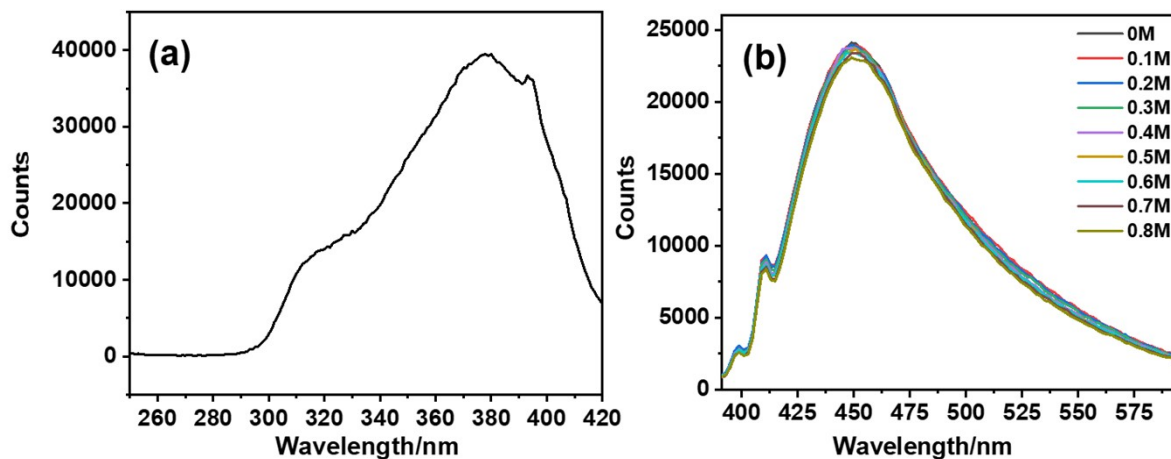

**Figure S10.** (a) Fluorescence excitation spectrum of TTEPY·3Br; (b) Fluorescence quenching of TTEPY·3Br ( $5 \times 10^{-4} \text{M}$ ) in MeCN in the presence of increasing amounts of ethylbenzene (from 0 to 0.8 M).

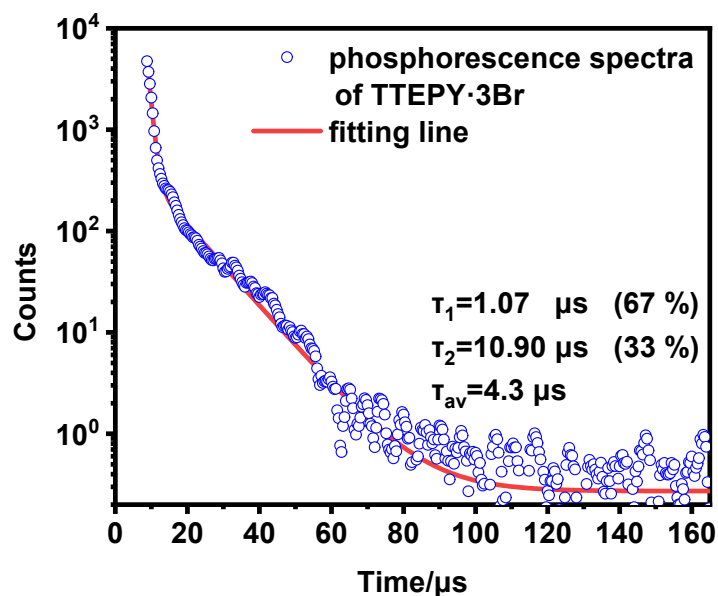

**Figure S11.** Phosphorescence lifetimes of TTEPY·3Br ( $5 \times 10^{-4} \text{M}$ ) in MeCN. The average

lifetime ( $\tau_{\text{av}}$ ) was then determined using the equation:  $\tau_{\text{av}} = \frac{\sum_{i=1}^{i=n} a_i \tau_i^2}{\sum_{i=1}^{i=n} a_i \tau_i}$

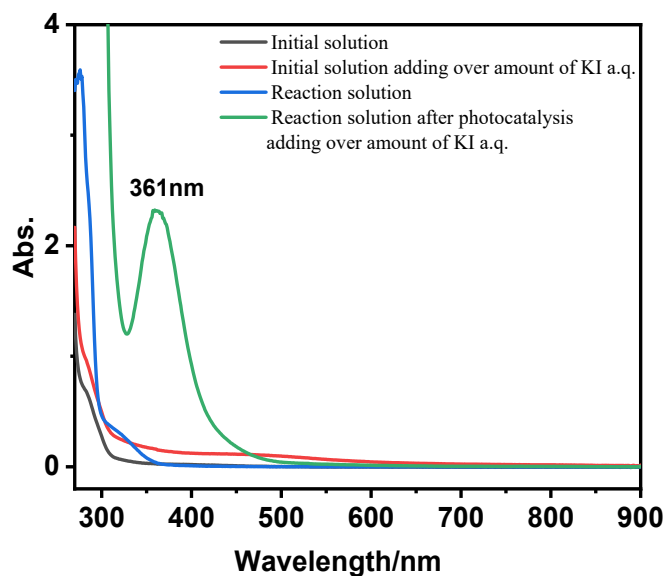

**Figure S12.** UV-Vis absorption spectra of the tri-iodide formed by  $\text{H}_2\text{O}_2$  oxidation. The formation of  $\text{H}_2\text{O}_2$  was confirmed by monitoring tri-iodide ( $\text{I}_3^-$ ) in aqueous solution. When over amount of KI was added to the reaction solution, the characteristic peak of  $\text{I}_3^-$  ions at ca.361 nm appeared due to the following reactions: [ Ref: Huang, W.; Ma, B. C.; Lu, H.; Li, R.; Wang, L.; Landfester, K.; Zhang, K. A. I. *ACS Catal.* **2017**, 7, 5438-5442]

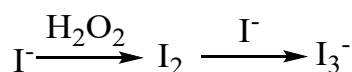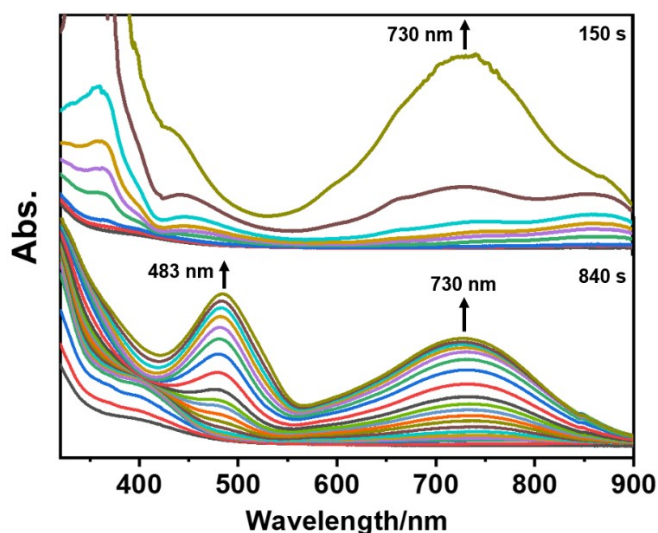

**Figure S13.** Comparison of the photoinduced absorption spectral changes of TTEPY·3Br ( $5 \times 10^{-4}\text{M}$ ) in MeCN in the presence of 0.5 M 1-phenylethanol (top) or 0.5 M ethylbenzene (bottom) under  $\text{N}_2$  atmosphere at room temperature with 365nm light irradiation for different time points.

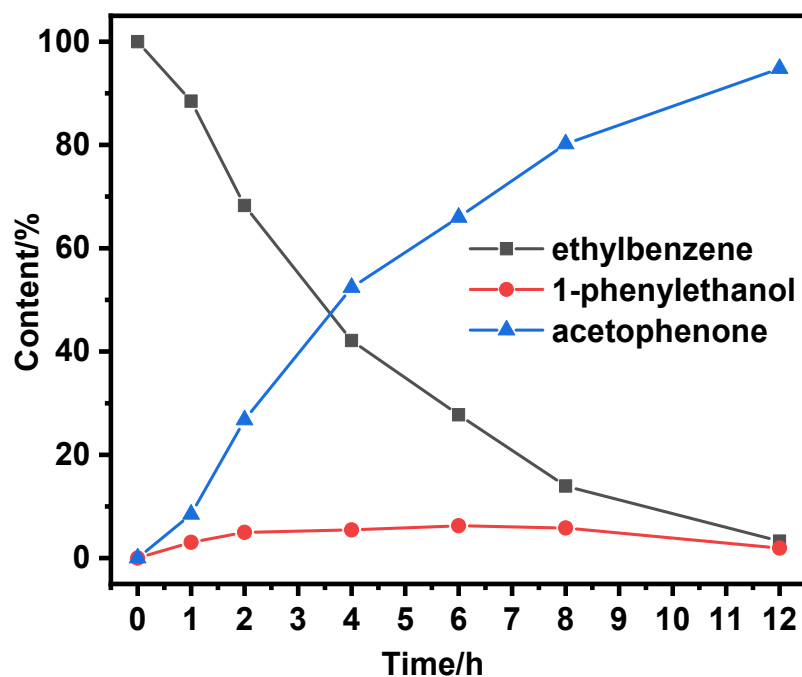

**Figure S14.** Time courses of the oxidation of ethylbenzene (Reaction conditions: 0.1 mmol ethylbenzene, 2 mol% catalyst, 2 mL acetonitrile, air atmosphere, room temperature, white light irradiation).

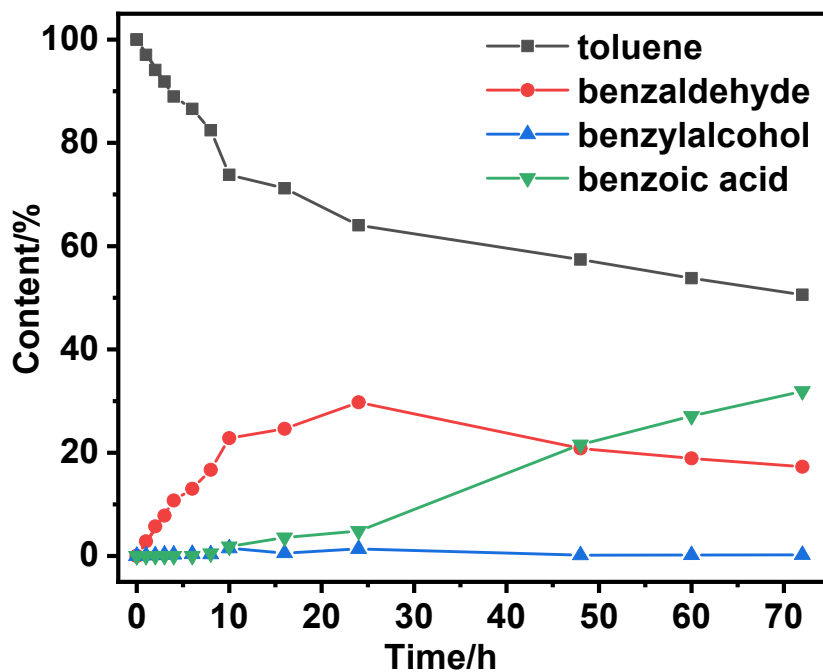

**Figure S15.** Time courses of the oxidation of toluene (Reaction conditions: 0.1 mmol ethylbenzene, 2 mol% catalyst, 2 mL acetonitrile, air atmosphere, room temperature, white light irradiation).

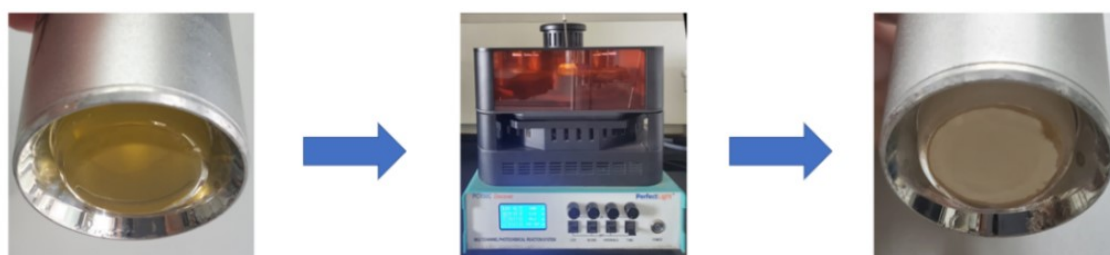

Before the reaction    Photocatalytic reactor    After the reaction  
**Figure S16.** The images showing the photocatalytic oxidation of p-xylene into terephthalic acid. The white precipitate can be observed after the reaction.

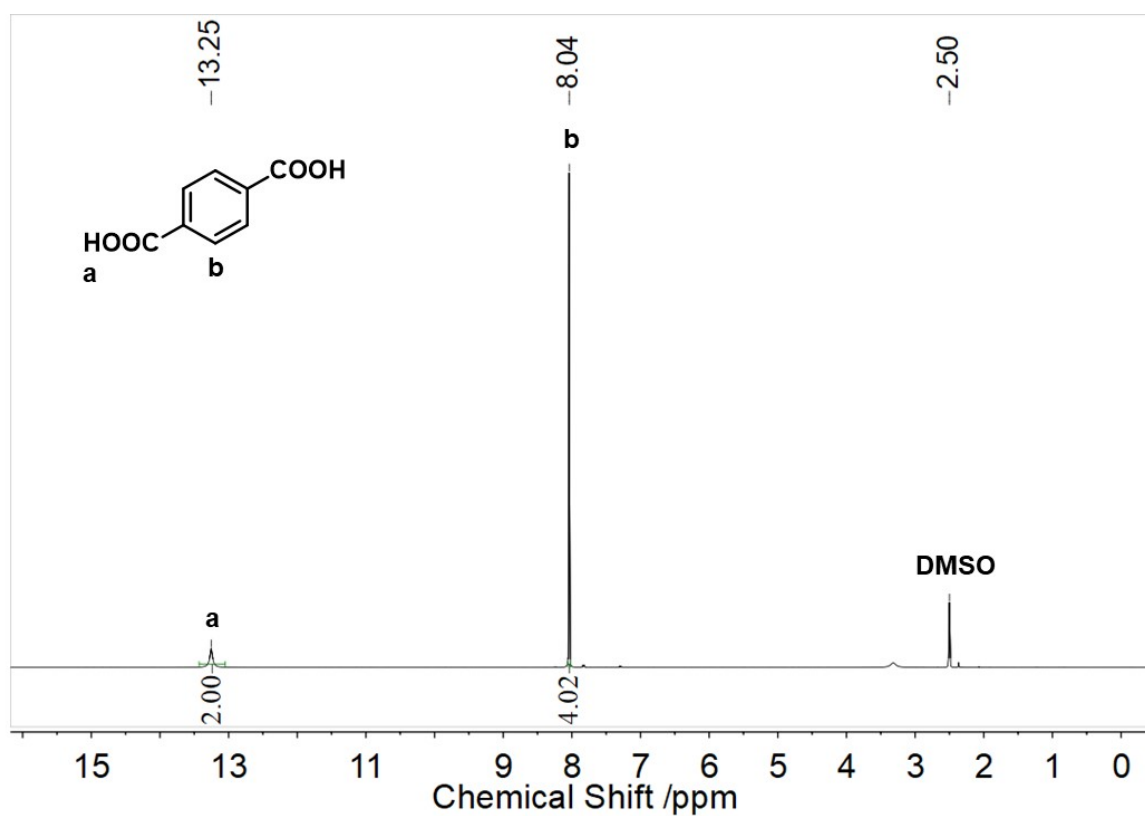

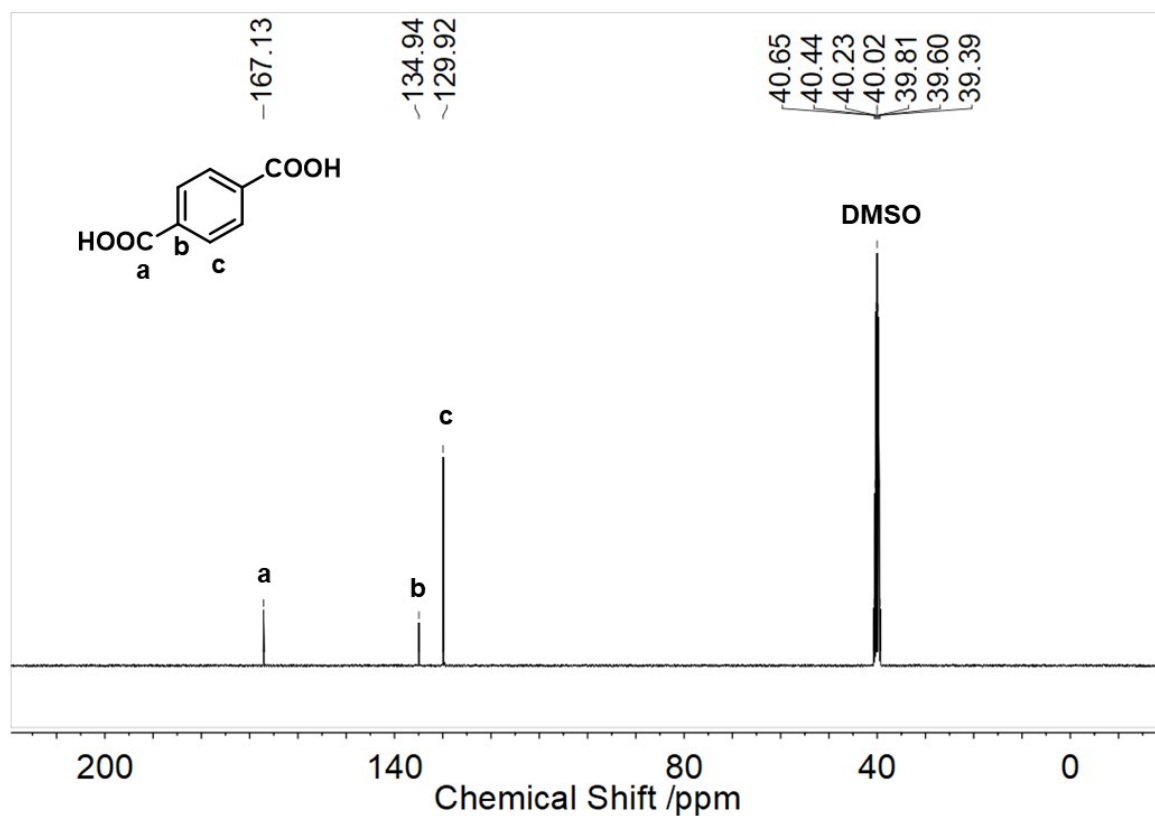

**Figure S17.**  $^1\text{H}$  (top; 400 MHz, DMSO) and  $^{13}\text{C}$  (bottom; 100 MHz, DMSO) NMR measurements of the terephthalic acid products ( $^1\text{H}$  NMR:  $\delta$  13.25 (s, 2H), 8.04 (s, 4H);  $^{13}\text{C}$  NMR:  $\delta$  167.13, 134.94, 129.92)

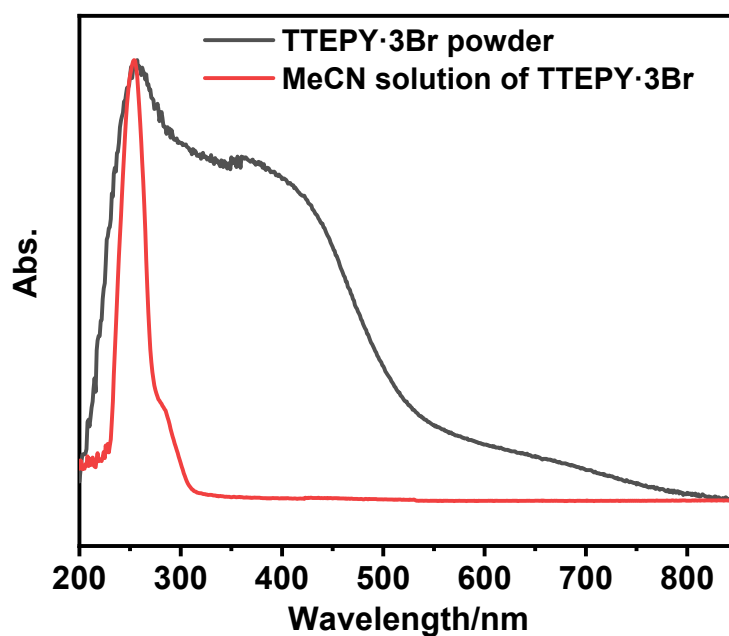

**Figure S18.** UV-vis absorption spectra of TTEPY·Br in MeCN ( $3 \times 10^{-5}$  M) and in the solid state.

**Table S1.** General substrate scope for the oxidations under the irradiation of white light source.

| Entry <sup>a</sup> | Substrate                                                                          | Product                                                                            | Time/<br>h | Yield <sup>b</sup> /<br>% |
|--------------------|------------------------------------------------------------------------------------|------------------------------------------------------------------------------------|------------|---------------------------|
| 1                  | 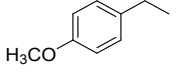  |   | 18         | 96                        |
| 2                  |   |   | 18         | 92                        |
| 3                  |   |   | 18         | 94                        |
| 4                  |   |   | 18         | 95                        |
| 5                  |   |   | 18         | >99                       |
| 6                  |  |  | 18         | 75                        |

(a) Reaction conditions: substrate: 0.1 mmol; catalyst: 2 mol%, 2 mL acetonitrile; in air condition; room temperature. (b) Determined by GC analysis.

### Section 3. NMR, GC, GC-Mass details

<sup>1</sup>H (400 MHz, CDCl<sub>3</sub>) NMR measurements of the acetophenone products (<sup>1</sup>H NMR: δ 7.89 (d, J = 7.2 Hz, 1H), 7.49 (t, J = 7.4 Hz, 1H), 7.40 (d, J = 7.8 Hz, 1H), 2.54 (s, 2H).

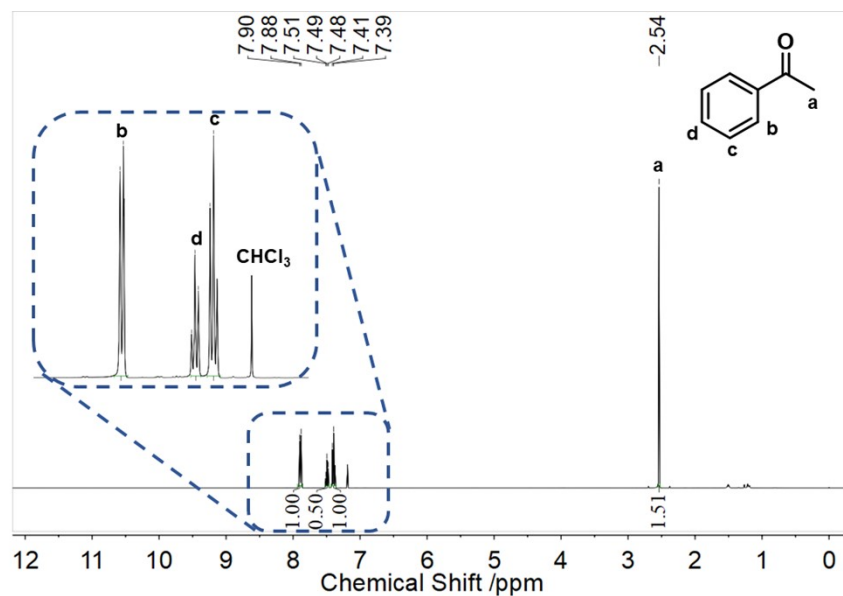

GC details of Figure 1:

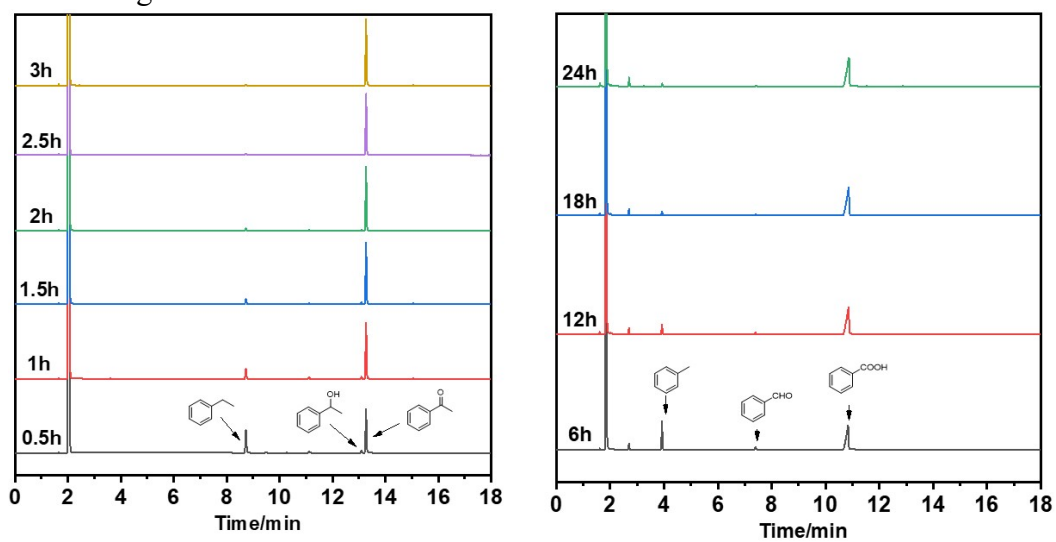

GC details of Table 1 and Figure S8:

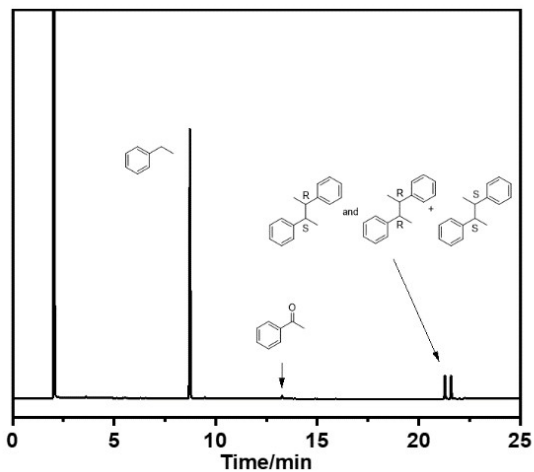

$N_2$  atmosphere

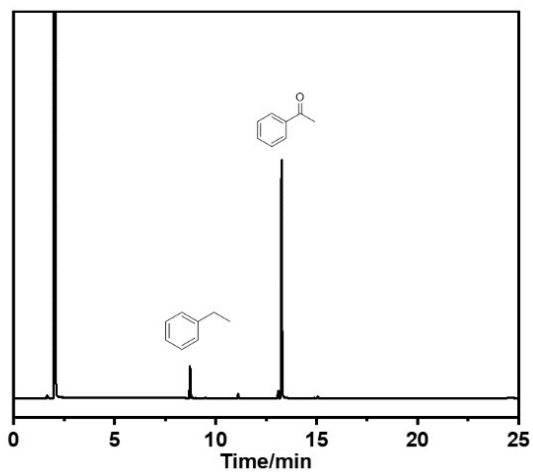

$O_2$  atmosphere

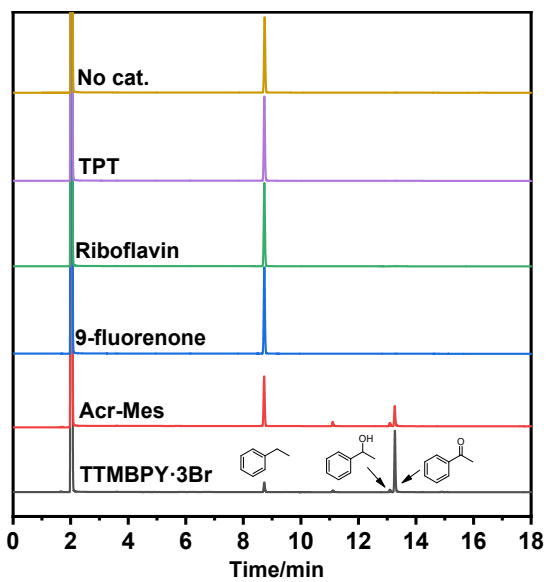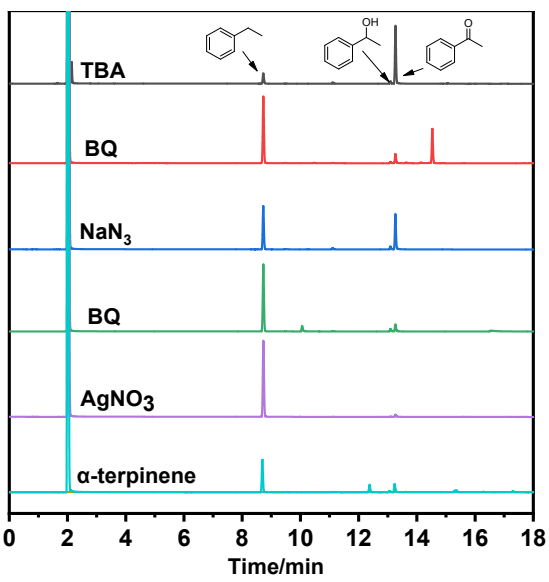



GC, GC-Mass details of Table 2:

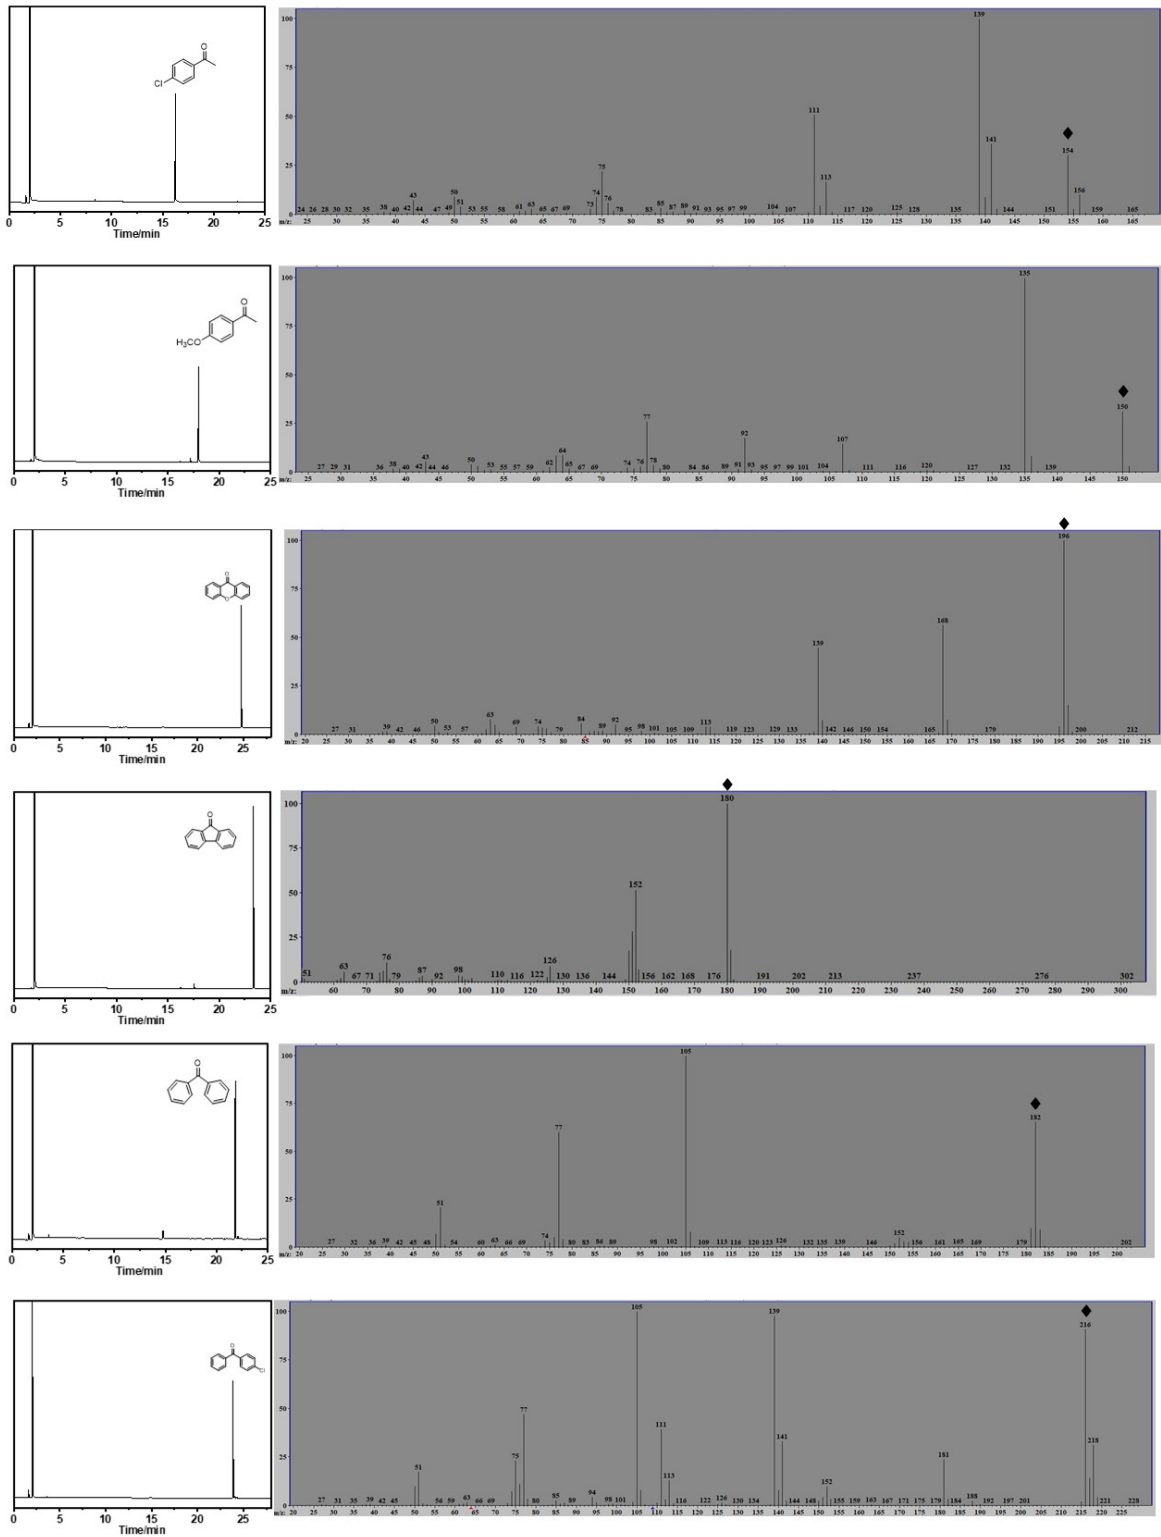

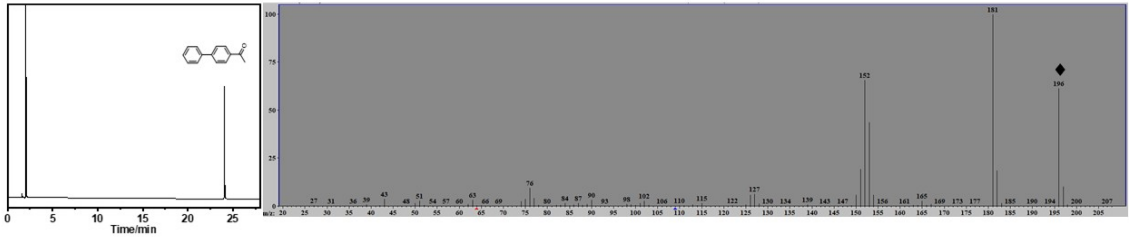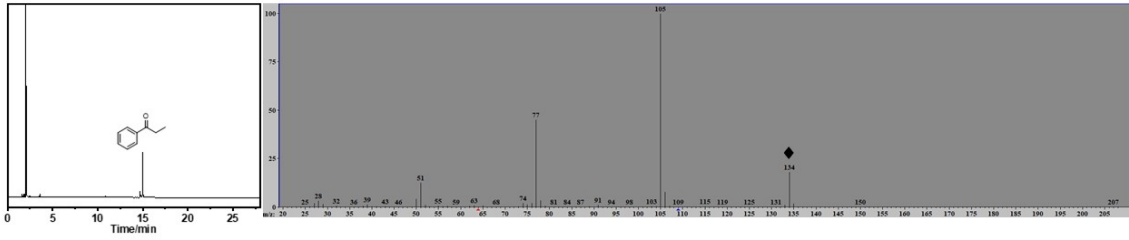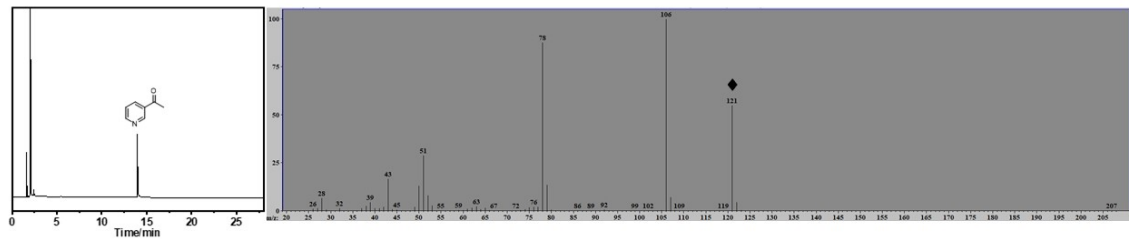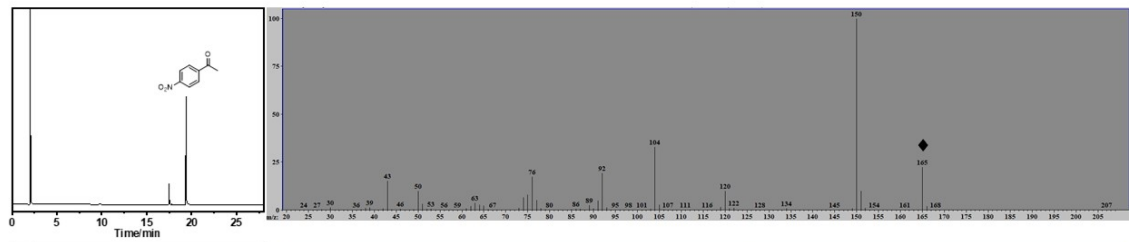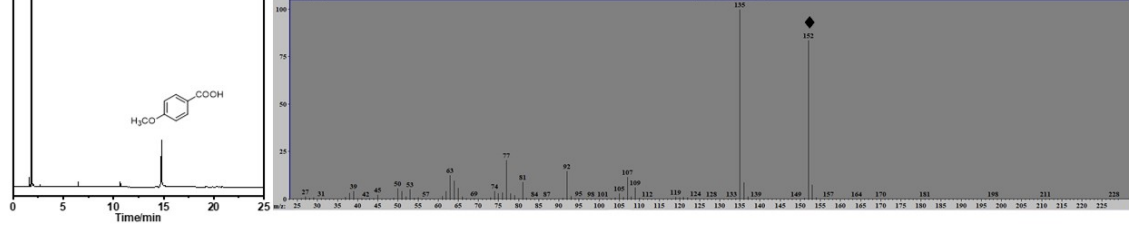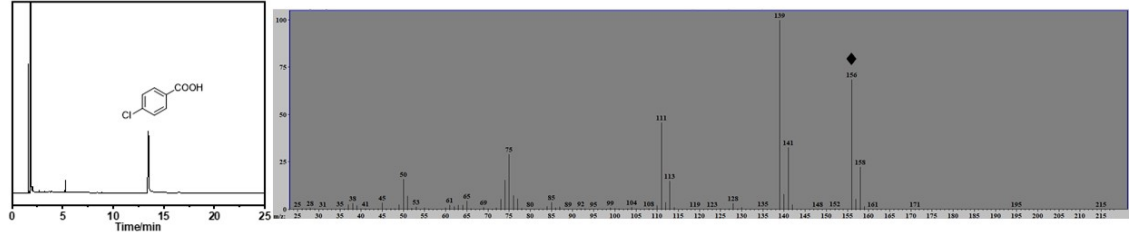

## Section 4. Spin density details for Cat, Ts-ini, Ts and Ts-pro

Cat (TTEPY·3Br):

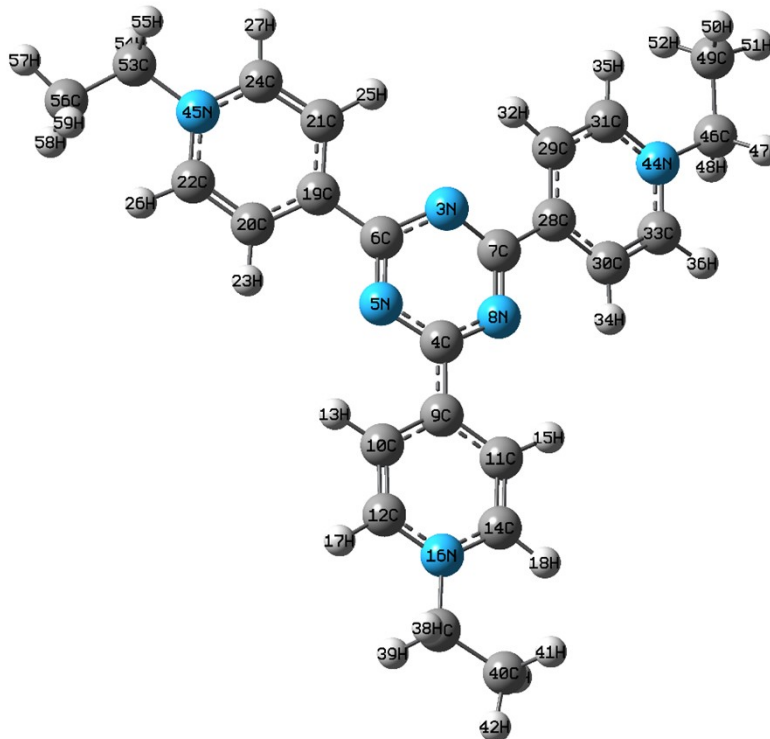

| Entry | Element | Spin density |
|-------|---------|--------------|
| 3     | N       | 1.037251     |
| 4     | C       | 0.392517     |
| 5     | N       | 0.009204     |
| 6     | C       | 0.120458     |
| 7     | C       | 0.122518     |
| 8     | N       | 0.006360     |
| 9     | C       | -0.072386    |
| 10    | C       | 0.093616     |
| 11    | C       | 0.108419     |
| 12    | C       | -0.027194    |
| 13    | H       | -0.004192    |
| 14    | C       | -0.026835    |
| 15    | H       | -0.004841    |
| 16    | N       | 0.102830     |
| 17    | H       | 0.000690     |
| 18    | H       | 0.000624     |
| 19    | C       | -0.017078    |
| 20    | C       | 0.030529     |

|    |   |           |
|----|---|-----------|
| 21 | C | 0.043678  |
| 22 | C | -0.002775 |
| 23 | H | -0.001292 |
| 24 | C | -0.017167 |
| 25 | H | -0.003573 |
| 26 | H | -0.000009 |
| 27 | H | 0.000562  |
| 28 | C | -0.017769 |
| 29 | C | 0.051126  |
| 30 | C | 0.026627  |
| 31 | C | -0.017537 |
| 32 | H | -0.004040 |
| 33 | C | -0.002647 |
| 34 | H | -0.001150 |
| 35 | H | 0.000531  |
| 36 | H | -0.000028 |
| 37 | C | -0.006440 |
| 38 | H | 0.005269  |
| 39 | H | 0.005147  |
| 40 | C | 0.000360  |
| 41 | H | 0.000080  |
| 42 | H | -0.000163 |
| 43 | H | 0.000074  |
| 44 | N | 0.033499  |
| 45 | N | 0.032293  |
| 46 | C | -0.002031 |
| 47 | H | 0.001566  |
| 48 | H | 0.001760  |
| 49 | C | 0.000109  |
| 50 | H | 0.000049  |
| 51 | H | -0.000052 |
| 52 | H | 0.000031  |
| 53 | C | -0.001942 |
| 54 | H | 0.001772  |
| 55 | H | 0.001457  |
| 56 | C | 0.000145  |
| 57 | H | -0.000047 |
| 58 | H | 0.000003  |
| 59 | H | 0.000033  |

---

Ts-*ini*:

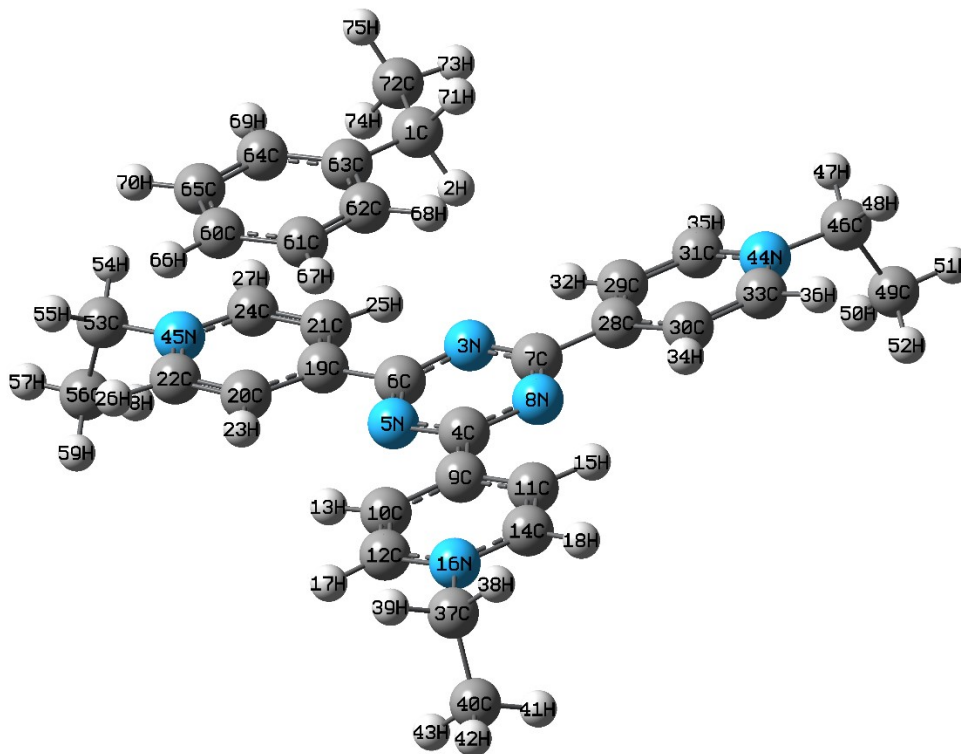

| Entry | Element | Spin density |
|-------|---------|--------------|
| 1     | C       | -0.032248    |
| 2     | H       | 0.044647     |
| 3     | N       | 0.221576     |
| 4     | C       | 0.190857     |
| 5     | N       | 0.040547     |
| 6     | C       | 0.001901     |
| 7     | C       | -0.005323    |
| 8     | N       | 0.054231     |
| 9     | C       | 0.103118     |
| 10    | C       | 0.067499     |
| 11    | C       | 0.065851     |
| 12    | C       | 0.025765     |
| 13    | H       | -0.004033    |
| 14    | C       | 0.026393     |
| 15    | H       | -0.003991    |
| 16    | N       | 0.169389     |
| 17    | H       | -0.001797    |
| 18    | H       | -0.001818    |
| 19    | C       | 0.008800     |

|    |   |           |
|----|---|-----------|
| 20 | C | -0.021673 |
| 21 | C | 0.006045  |
| 22 | C | 0.029104  |
| 23 | H | 0.000810  |
| 24 | C | 0.015495  |
| 25 | H | -0.000964 |
| 26 | H | -0.001092 |
| 27 | H | -0.000698 |
| 28 | C | 0.003902  |
| 29 | C | 0.007307  |
| 30 | C | -0.002317 |
| 31 | C | -0.003303 |
| 32 | H | -0.000979 |
| 33 | C | 0.008300  |
| 34 | H | -0.000130 |
| 35 | H | 0.000084  |
| 36 | H | -0.000367 |
| 37 | C | -0.009758 |
| 38 | H | 0.003396  |
| 39 | H | 0.002470  |
| 40 | C | 0.009762  |
| 41 | H | -0.000639 |
| 42 | H | 0.001049  |
| 43 | H | -0.000624 |
| 44 | N | 0.005871  |
| 45 | N | 0.004226  |
| 46 | C | -0.000308 |
| 47 | H | 0.000081  |
| 48 | H | 0.000104  |
| 49 | C | 0.000331  |
| 50 | H | -0.000008 |
| 51 | H | 0.000034  |
| 52 | H | -0.000048 |
| 53 | C | -0.000262 |
| 54 | H | 0.000062  |
| 55 | H | 0.000102  |
| 56 | C | 0.000452  |
| 57 | H | 0.000035  |
| 58 | H | -0.000048 |
| 59 | H | -0.000092 |

---

|    |   |           |
|----|---|-----------|
| 60 | C | 0.508613  |
| 61 | C | -0.073213 |
| 62 | C | 0.093634  |
| 63 | C | 0.430179  |
| 64 | C | 0.037442  |
| 65 | C | -0.021124 |
| 66 | H | -0.023659 |
| 67 | H | -0.000322 |
| 68 | H | -0.006921 |
| 69 | H | -0.004457 |
| 70 | H | -0.002141 |
| 71 | H | 0.031093  |
| 72 | C | 0.000224  |
| 73 | H | -0.000708 |
| 74 | H | 0.002059  |
| 75 | H | 0.002226  |

---

Ts:

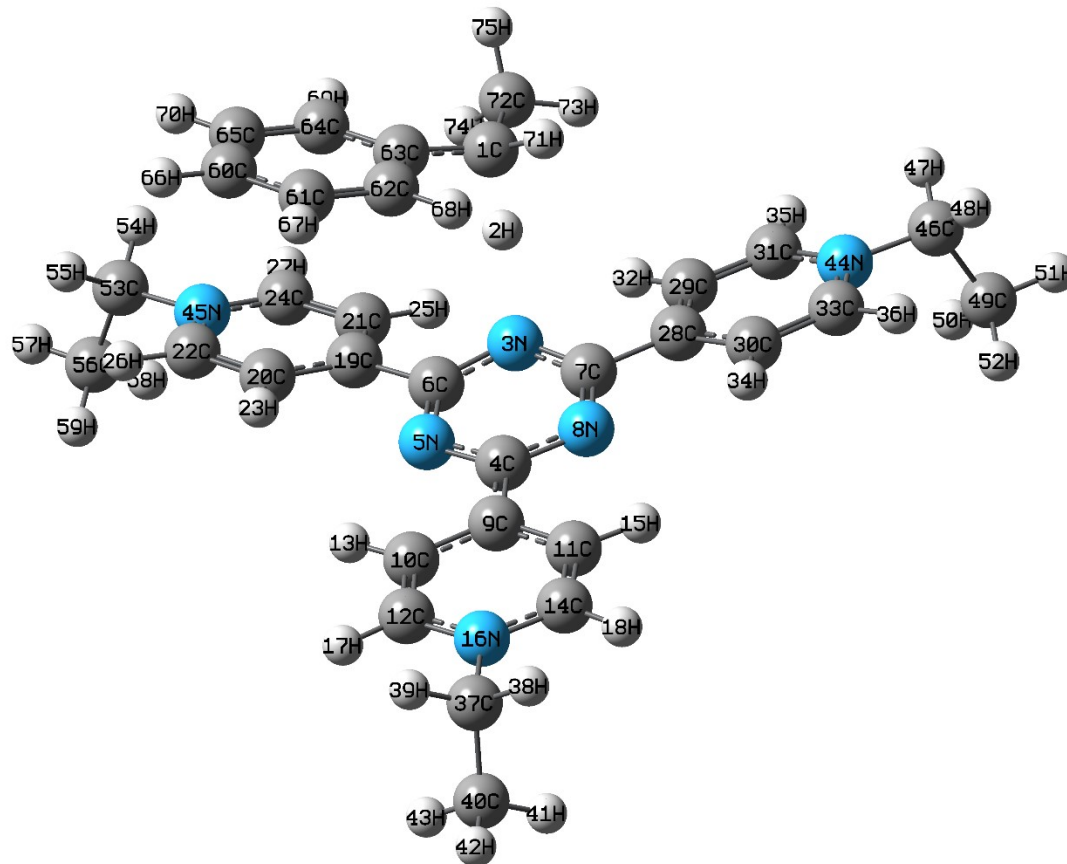

| Entry | Element | Spin density |
|-------|---------|--------------|
| 1     | C       | 0.113067     |
| 2     | H       | 0.081856     |
| 3     | N       | 0.309295     |
| 4     | C       | 0.242861     |
| 5     | N       | 0.031532     |
| 6     | C       | 0.025955     |
| 7     | C       | 0.029548     |
| 8     | N       | 0.022851     |
| 9     | C       | 0.049826     |
| 10    | C       | 0.078553     |
| 11    | C       | 0.079788     |
| 12    | C       | 0.009884     |
| 13    | H       | -0.004256    |
| 14    | C       | 0.009958     |
| 15    | H       | -0.004288    |
| 16    | N       | 0.152554     |
| 17    | H       | -0.001043    |
| 18    | H       | -0.001051    |



|    |   |           |
|----|---|-----------|
| 19 | C | -0.008941 |
| 20 | C | 0.003952  |
| 21 | C | 0.023210  |
| 22 | C | 0.005490  |
| 23 | H | -0.000053 |
| 24 | C | 0.001136  |
| 25 | H | -0.001367 |
| 26 | H | -0.000225 |
| 27 | H | -0.000163 |
| 28 | C | 0.000677  |
| 29 | C | 0.014425  |
| 30 | C | 0.004760  |
| 31 | C | -0.005954 |
| 32 | H | -0.000913 |
| 33 | C | 0.006476  |
| 34 | H | -0.000346 |
| 35 | H | 0.000152  |
| 36 | H | -0.000321 |
| 37 | C | -0.008622 |
| 38 | H | 0.002246  |
| 39 | H | 0.002945  |
| 40 | C | 0.008580  |
| 41 | H | -0.000500 |
| 42 | H | 0.000961  |
| 43 | H | -0.000517 |
| 44 | N | 0.013980  |
| 45 | N | 0.016771  |
| 46 | C | -0.000733 |
| 47 | H | 0.000193  |
| 48 | H | 0.000258  |
| 49 | C | 0.000745  |
| 50 | H | -0.000026 |
| 51 | H | 0.000077  |
| 52 | H | -0.000065 |
| 53 | C | -0.000905 |
| 54 | H | 0.000318  |
| 55 | H | 0.000255  |
| 56 | C | 0.000916  |
| 57 | H | 0.000090  |
| 58 | H | -0.000058 |

---

|    |   |           |
|----|---|-----------|
| 59 | H | -0.000059 |
| 60 | C | 0.393147  |
| 61 | C | -0.102225 |
| 62 | C | 0.166328  |
| 63 | C | 0.171079  |
| 64 | C | 0.140636  |
| 65 | C | -0.082807 |
| 66 | H | -0.018293 |
| 67 | H | 0.002044  |
| 68 | H | -0.008888 |
| 69 | H | -0.007654 |
| 70 | H | 0.001303  |
| 71 | H | 0.020555  |
| 72 | C | -0.003250 |
| 73 | H | -0.000214 |
| 74 | H | 0.005345  |
| 75 | H | 0.017161  |

---

Ts-pro:

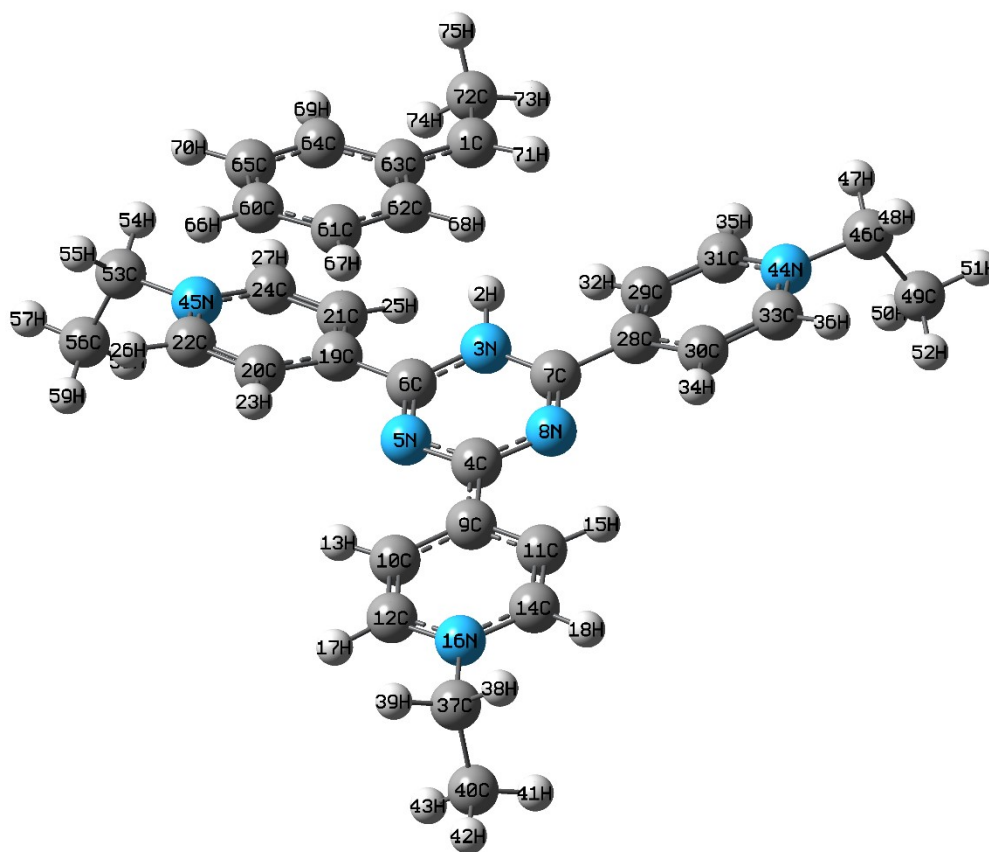

| Entry | Element | Spin density |
|-------|---------|--------------|
| 1     | C       | 0.815571     |
| 2     | H       | 0.014341     |
| 3     | N       | 0.197170     |
| 4     | C       | 0.363362     |
| 5     | N       | -0.037304    |
| 6     | C       | 0.108265     |
| 7     | C       | 0.155903     |
| 8     | N       | -0.076556    |
| 9     | C       | -0.054583    |
| 10    | C       | 0.094370     |
| 11    | C       | 0.090163     |
| 12    | C       | -0.018625    |
| 13    | H       | -0.004317    |
| 14    | C       | -0.016260    |
| 15    | H       | -0.004115    |
| 16    | N       | 0.108127     |
| 17    | H       | 0.000321     |
| 18    | H       | 0.000244     |

|    |   |           |
|----|---|-----------|
| 19 | C | -0.014016 |
| 20 | C | 0.013333  |
| 21 | C | 0.029313  |
| 22 | C | 0.002660  |
| 23 | H | -0.000300 |
| 24 | C | -0.008954 |
| 25 | H | -0.002590 |
| 26 | H | -0.000130 |
| 27 | H | 0.000199  |
| 28 | C | -0.024668 |
| 29 | C | 0.042202  |
| 30 | C | 0.028410  |
| 31 | C | -0.014462 |
| 32 | H | -0.002791 |
| 33 | C | 0.000870  |
| 34 | H | -0.001303 |
| 35 | H | 0.000391  |
| 36 | H | -0.000170 |
| 37 | C | -0.005836 |
| 38 | H | 0.002165  |
| 39 | H | 0.001422  |
| 40 | C | 0.005821  |
| 41 | H | -0.000272 |
| 42 | H | 0.000712  |
| 43 | H | -0.000237 |
| 44 | N | 0.036474  |
| 45 | N | 0.021466  |
| 46 | C | -0.001892 |
| 47 | H | 0.000497  |
| 48 | H | 0.000693  |
| 49 | C | 0.001940  |
| 50 | H | -0.000066 |
| 51 | H | 0.000225  |
| 52 | H | -0.000105 |
| 53 | C | -0.001102 |
| 54 | H | 0.000308  |
| 55 | H | 0.000398  |
| 56 | C | 0.001151  |
| 57 | H | 0.000115  |
| 58 | H | -0.000044 |

---

|    |   |           |
|----|---|-----------|
| 59 | H | -0.000058 |
| 60 | C | 0.227987  |
| 61 | C | -0.104656 |
| 62 | C | 0.202452  |
| 63 | C | -0.210477 |
| 64 | C | 0.212131  |
| 65 | C | -0.106370 |
| 66 | H | -0.010734 |
| 67 | H | 0.003038  |
| 68 | H | -0.009976 |
| 69 | H | -0.010026 |
| 70 | H | 0.003314  |
| 71 | H | -0.039260 |
| 72 | C | -0.074954 |
| 73 | H | 0.004212  |
| 74 | H | 0.021632  |
| 75 | H | 0.043841  |

---

## Section 5. The spectra of the light source used in photocatalytic reaction

The spectra of 365 nm light source:

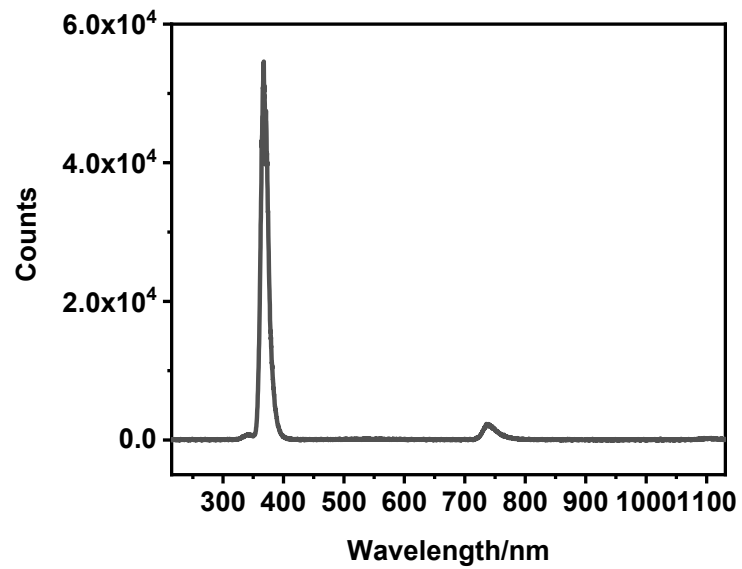

The spectra of white light source:

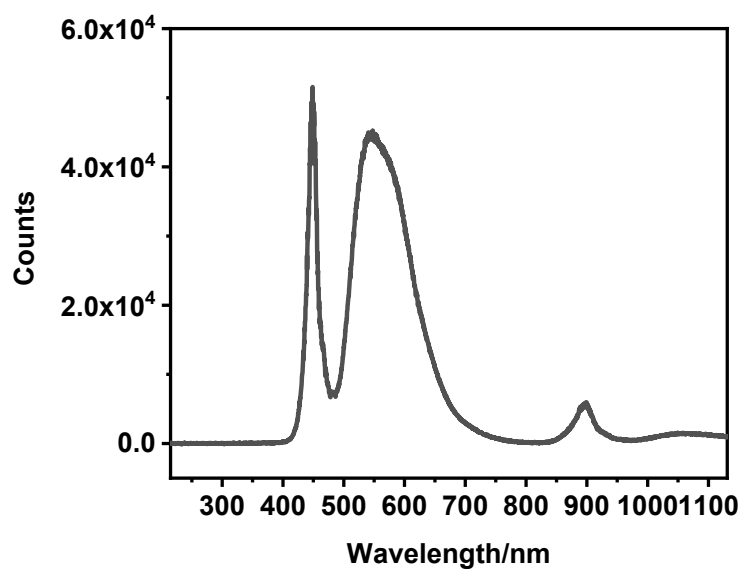

Supplement: d1gc04370f1.pdf [file d1gc04370f1.pdf]
